# Supplementary material for: Liquid marbles as biochemical reactors for the polymerase chain reaction
Source: Royal Society of Chemistry journal article supplement (doi:10.1039/c9lc00676a), 2019-01-01
Supplement: c9lc00676a1.pdf [file c9lc00676a1.pdf]

### DNA and Primer Optimisation

We carried out DNA and primer optimization to optimize the amount of PCR reaction reagents. The reaction mixture (20  $\mu$ l) for DNA optimization contained 10  $\mu$ l GoTaq Green master mix, 1  $\mu$ l (10  $\mu$ M) of each forward and reverse primer, and a range of the template DNA including 0.5, 1, 1.5, 2, 2.5, 3, 3.5, 4  $\mu$ l (100ng/ $\mu$ l). The reaction mixture (20  $\mu$ l) for primer optimization consisted of 10 $\mu$ l GoTaq Green master mix, 2.5  $\mu$ l (100ng/ $\mu$ l) of template DNA, and a range of each forward and reverse primer (0.25, 0.5, 1, 1.25, 1.5, 2, 2.25, 2.5  $\mu$ l). The results demonstrate that the amount of 2.5  $\mu$ l for DNA and primers is the optimum amount for PCR in this experiment.

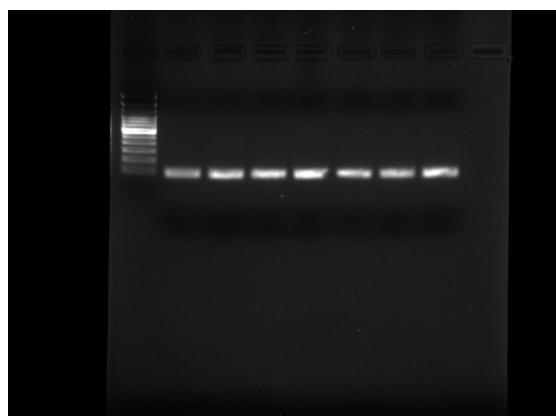

*DNA optimization*

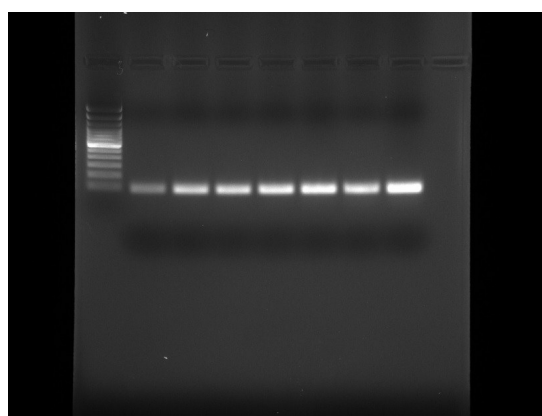

*Primer optimization.*
